# Supplementary material for: Sex Differences in Trends and In‐Hospital Outcomes Among Patients With Critical Limb Ischemia: A Nationwide Analysis
Source: PubMed Central journal article supplement — J Am Heart Assoc. 2021 Sep 17;10(18):e022043. doi: 10.1161/JAHA.121.022043 (PMC8649496; doi:10.1161/jaha.121.022043), 2021-09-17
Supplement: JAH3-10-e022043-s001.pdf [file JAH3-10-e022043-s001.pdf]

# **SUPPLEMENTAL MATERIAL**

**Table S1. International Classification of Diseases, Ninth Edition, Clinical Modification (ICD-9- CM) codes used to identify the baseline comorbidities, procedures, and in-hospital outcomes.**

| <b>Critical limb ischemia</b>                                                                                                              |                                                        |
|--------------------------------------------------------------------------------------------------------------------------------------------|--------------------------------------------------------|
| Atherosclerosis of native arteries of extremities                                                                                          |                                                        |
| -with rest pain                                                                                                                            | 440.22                                                 |
| -with gangrene                                                                                                                             | 440.24                                                 |
| -with ulceration                                                                                                                           | 440.23, 707.9                                          |
| <b>Critical limb ischemia</b> if following code is present along with a primary diagnosis code for PAD*                                    |                                                        |
| Gangrene                                                                                                                                   | 785.4                                                  |
| Ulcer of lower limb (includes trophic ulcer)                                                                                               | 707.10, 707.11, 707.12, 707.13, 707.14, 707.15, 707.19 |
| Acute osteomyelitis of pelvic region and thigh                                                                                             | 730.05                                                 |
| Acute osteomyelitis of lower extremity                                                                                                     | 730.06                                                 |
| Acute osteomyelitis of ankle and foot                                                                                                      | 730.07                                                 |
| Chronic osteomyelitis of pelvic region and thigh                                                                                           | 730.15                                                 |
| Chronic osteomyelitis of lower extremity                                                                                                   | 730.16                                                 |
| Chronic osteomyelitis of ankle and foot                                                                                                    | 730.17                                                 |
| Cellulitis of lower extremity except foot                                                                                                  | 682.6                                                  |
| Cellulitis of foot except toes                                                                                                             | 682.7                                                  |
| Cellulitis of toes                                                                                                                         | 681.1                                                  |
| <b>*Primary PAD diagnosis</b>                                                                                                              |                                                        |
| Atherosclerosis of native arteries of extremities with intermittent claudication, rest pain, ulceration, gangrene or unspecified symptoms. | 440.2 (440.20-440.24, 440.29)                          |
| Atherosclerosis of bypass graft of extremities                                                                                             | 440.3 (440.0-440.32)                                   |
| Atherosclerosis- generalized or unspecified                                                                                                | 440.9                                                  |
| Atherosclerosis of Aorta                                                                                                                   | 440.0                                                  |
| Diabetes mellitus with peripheral circulatory disorders                                                                                    | 249.70, 249.71, 250.70-250.73                          |
| Peripheral angiopathy in other diseases                                                                                                    | 443.81                                                 |

|                                                                           |                |
|---------------------------------------------------------------------------|----------------|
| Peripheral vascular disease, unspecified                                  | 443.9          |
| Buerger's disease                                                         | 443.1          |
| Arterial embolism/ thrombosis of lower extremity<br>or iliofemoral artery | 444.22, 444.81 |
| <b>Surgical Revascularization</b>                                         |                |
| Aorto-iliac femoral bypass                                                | 39.25          |
| Peripheral bypass                                                         | 39.29          |
| Incision of lower limb arteries                                           | 38.08          |
| Endarterectomy of abdominal arteries                                      | 38.16          |
| Endarterectomy of lower limb arteries                                     | 38.18          |
| Resection of vessel with anastomosis                                      | 38.38          |
| Resection of vessel with replacement                                      | 38.48          |
| <b>Endovascular revascularization</b>                                     |                |
| Angioplasty or atherectomy of non-coronary vessel                         | 39.50          |
| Insertion of non-drug-eluting, non-coronary artery<br>stent               | 39.90          |
| Insertion of drug eluting peripheral vessel stent                         | 00.55          |
| <b>Major amputation of lower extremity</b>                                |                |
| Lower limb amputation                                                     | 84.10          |
| Disarticulation of ankle                                                  | 84.13          |
| Amputation of ankle through malleoli of tibia and<br>fibula               | 84.14          |
| Other amputation-below knee                                               | 84.15          |
| Disarticulation of knee                                                   | 84.16          |
| Amputation above knee                                                     | 84.17          |
| Revision of amputation stump                                              | 84.3           |
| <b>Minor amputation of lower extremity</b>                                |                |
| Toe amputation                                                            | 84.11          |

|                                                                                                         |                                                                   |
|---------------------------------------------------------------------------------------------------------|-------------------------------------------------------------------|
| Trans metatarsal amputation                                                                             | 84.12                                                             |
| <b>Vascular procedures, non-specific, only used in conjunction with lower extremity procedure codes</b> |                                                                   |
| Procedure on single vessel                                                                              | 00.40                                                             |
| Procedure on two vessels                                                                                | 00.41                                                             |
| Procedure on three vessels                                                                              | 00.42                                                             |
| Procedure on $\geq 4$ vessels                                                                           | 00.43                                                             |
| Procedure on vessel bifurcation                                                                         | 00.44                                                             |
| Insertion of one vascular stent                                                                         | 00.45                                                             |
| Insertion of two vascular stents                                                                        | 00.46                                                             |
| Insertion of three vascular stents                                                                      | 00.47                                                             |
| Insertion of $\geq 4$ vascular stents                                                                   | 00.48                                                             |
| Non-ST-elevation myocardial infarction                                                                  | 410.7x                                                            |
| ST-elevation myocardial infarction                                                                      | 410.1x, 410.2x, 410.3x, 410.4x, 410.5x, 410.6x, 410.8x and 410.9x |
| Prior myocardial infarction                                                                             | 412.0                                                             |
| Previous percutaneous coronary intervention                                                             | V45.82                                                            |
| Previous coronary artery bypass grafting                                                                | V45.81                                                            |
| Previous CVA                                                                                            | V12.54                                                            |
| Carotid artery disease                                                                                  | 433.10                                                            |
| Cardiogenic shock                                                                                       | 785.51                                                            |
| Cardiac arrest                                                                                          | CCS-107                                                           |
| Post-op hemorrhage                                                                                      | 998.11, 998.12, 285.1                                             |
| Transfusion                                                                                             | 99.01-99.09                                                       |

---

|                           |                                                                         |
|---------------------------|-------------------------------------------------------------------------|
| Acute stroke              | CCS-100                                                                 |
| Respiratory complications | 997.3, 997.31, 997.32, 997.39                                           |
| Permanent pacemaker       | 37.80 37.83                                                             |
| Acute kidney injury       | 584                                                                     |
| Vascular complications    | 39.31, 39.41, 39.49, 39.52, 39.53,<br>39.56, 39.57, 39.58, 39.59, 39.79 |

---

**Table S2. List of variables used in the propensity score matching analysis comparing the revascularization strategies.**

Age, race, diabetes mellitus, hypertension, obesity, history of heart failure, chronic lung disease, pulmonary circulation disorders, chronic liver disease, CKD, chronic anemia, coagulopathy, hypothyroidism, history of smoking, coronary artery disease, prior MI, history of implantable cardiac defibrillator, history of cardiac pacemaker, prior stroke, prior PCI, prior CABG, hospital bed-size, hospital region, hospital teaching status.

**Table S3. In-hospital outcomes among women versus men with critical limb ischemia after propensity score matching**

| Outcome                     | Incidences % |       | Adjusted odds ratio | 95% confidence interval | P-value |
|-----------------------------|--------------|-------|---------------------|-------------------------|---------|
|                             | Women        | Men   |                     |                         |         |
| Mortality                   | 3.7%         | 3.4%  | 1.09                | 1.07-1.10               | <0.001  |
| Amputation free survival    | 82.0%        | 81.1% | 1.06                | 1.05-1.07               | <0.001  |
| Major amputation            | 15.3%        | 16.4% | 0.92                | 0.91-0.93               | <0.001  |
| Minor amputation            | 10.0%        | 14.3% | 0.67                | 0.66-0.67               | <0.001  |
| Post-operative infection    | 2.3%         | 1.9%  | 1.17                | 1.15-1.20               | <0.001  |
| Post-operative hemorrhage   | 8.1%         | 7.1%  | 1.16                | 1.15-1.18               | <0.001  |
| Blood transfusion           | 18.3%        | 16.0% | 1.17                | 1.17-1.18               | <0.001  |
| Acute myocardial infarction | 3.0%         | 3.0%  | 0.99                | 0.97-1.00               | 0.10    |
| Ischemic stroke             | 0.9%         | 0.7%  | 1.25                | 1.22-1.29               | <0.001  |
| Acute kidney injury         | 11.3%        | 12.9% | 0.86                | 0.85-0.87               | <0.001  |
| Facility discharge          | 39.5%        | 37.4% | 1.09                | 1.09-1.10               | <0.001  |

Table S4. Sex-related differences in in-hospital mortality across various racial groups.

| Outcome                | Incidences % |      | Odds ratio | 95% confidence interval |       | P-value |
|------------------------|--------------|------|------------|-------------------------|-------|---------|
|                        | Women        | Men  |            |                         |       |         |
| <b><i>White</i></b>    |              |      |            |                         |       |         |
| Mortality              | 3.5%         | 3.3% | 1.083      | 1.063                   | 1.103 | <0.001  |
| <b><i>Black</i></b>    |              |      |            |                         |       |         |
| Mortality              | 3.8%         | 3.2% | 1.191      | 1.151                   | 1.233 | <0.001  |
| <b><i>Hispanic</i></b> |              |      |            |                         |       |         |
| Mortality              | 3.7%         | 3.1% | 1.206      | 1.149                   | 1.266 | <0.001  |



Figure S1. Subgroup analyses for in-hospital mortality and post-operative hemorrhage comparing age 50 years versus <50 years, and urban versus rural hospitals.

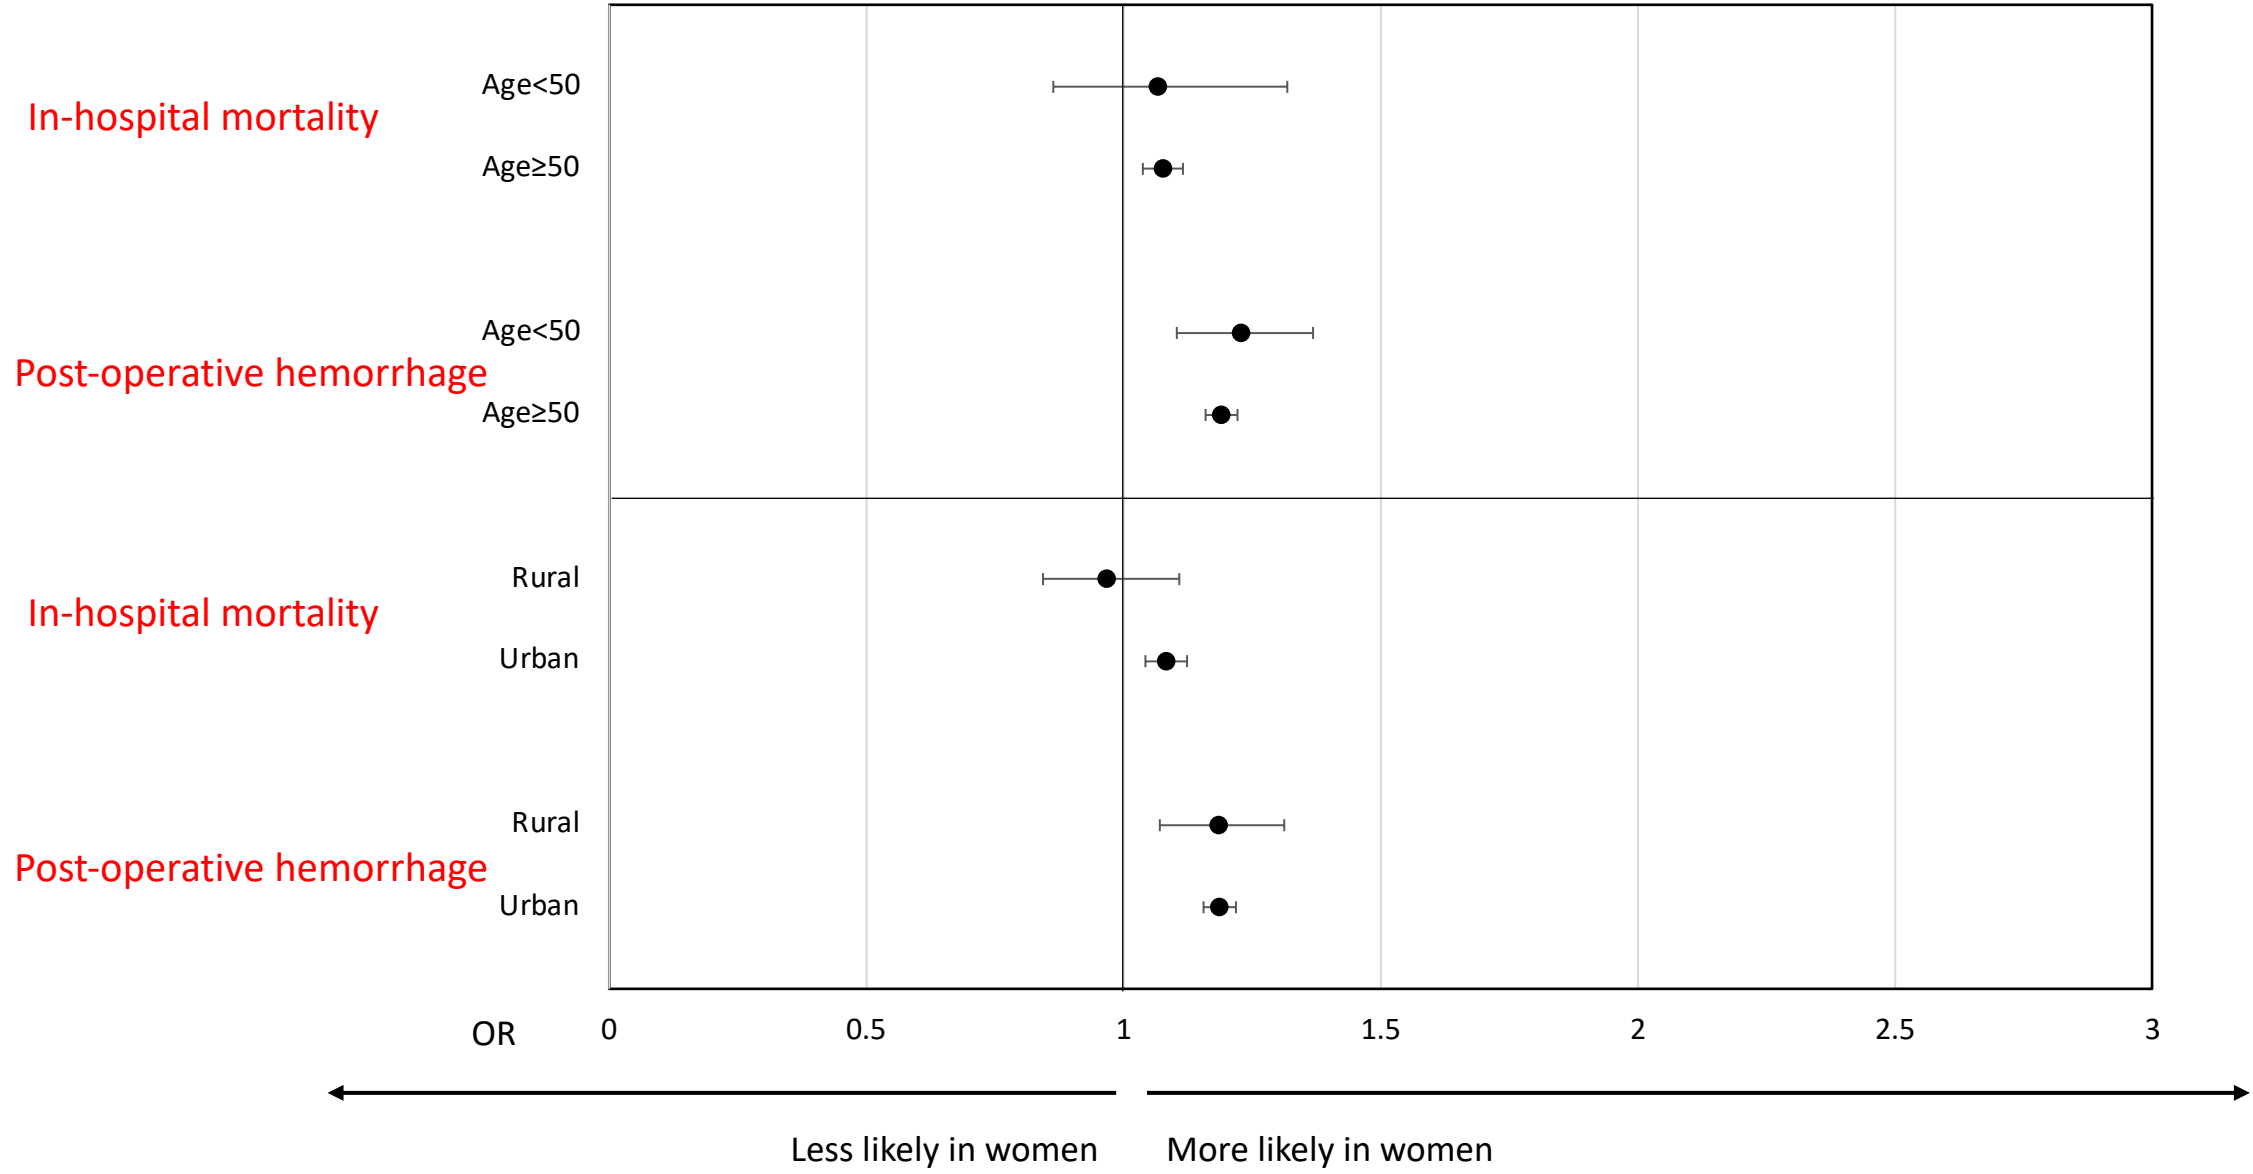

(A)

Standardized differences before matching

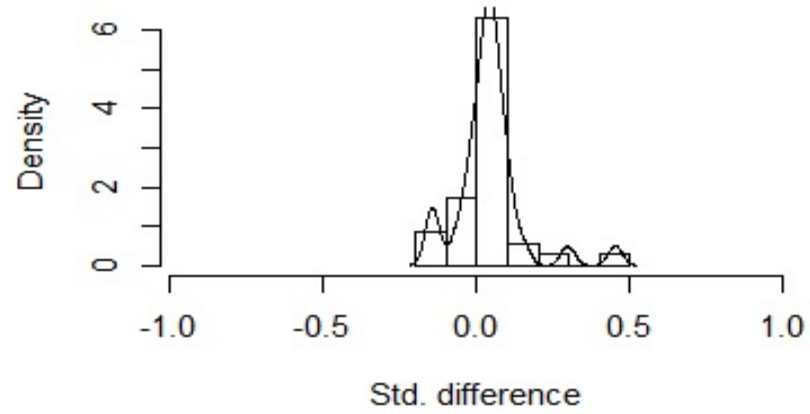

Standardized differences after matching

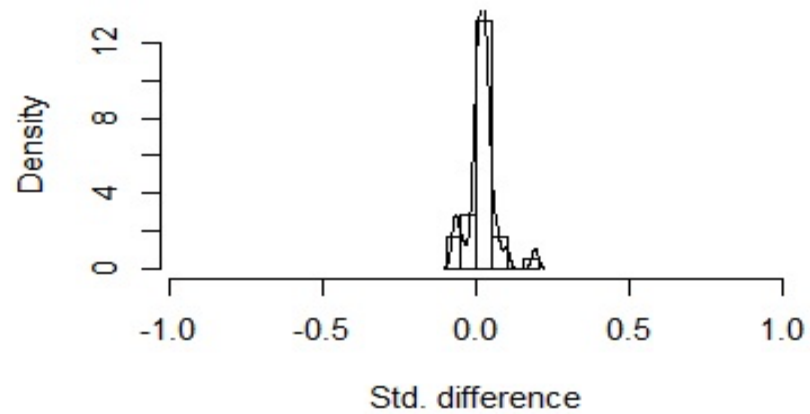

(B)

Standardized differences before matching

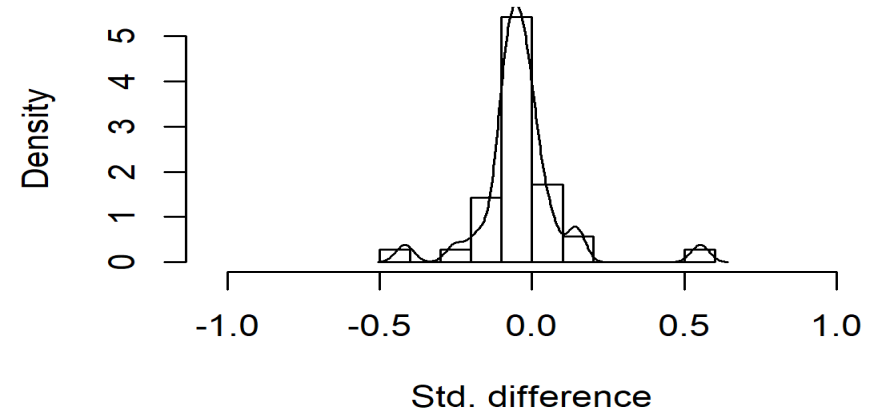

Standardized differences after matching

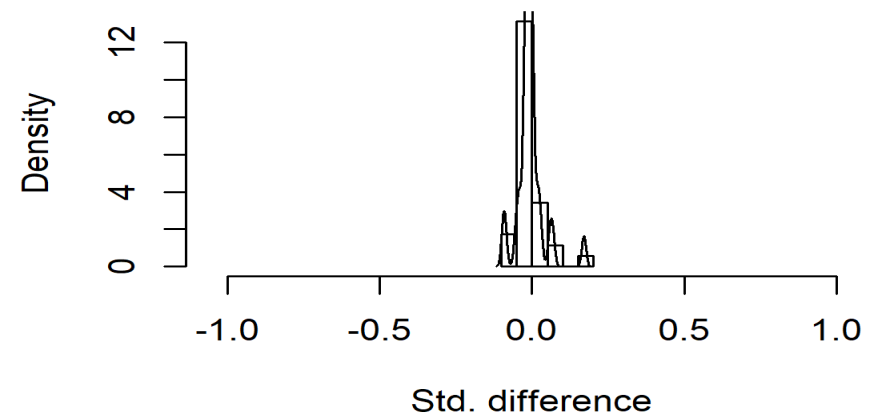

Figure S2. Absolute standardized differences for the patient and hospital-related characteristics included in the propensity matched model comparing endovascular revascularization versus surgical revascularization among (A) women and (B) men.
